# Supplementary material for: Synthesis of N-methylene phosphonate aziridines: reaction scope and mechanistic insights
Source: Royal Society of Chemistry journal article supplement (doi:10.1039/d2nj00595f), 2022-01-01

## Synthesis of aziridine *N*-methylenephosphonates: Reaction scope and mechanistic insights

### Supporting Information

Thomas Cheviet,<sup>[a]</sup> Ilyana Gonzales,<sup>[a]</sup> and Suzanne Peyrottes\*<sup>[a]</sup>

Team Nucleosides & Phosphorylated Effectors, Institute for Biomolecules Max Mousseron (IBMM), Univ Montpellier, CNRS, ENSCM, Pole Chimie Balard Recherche, 1919, route de Mende, 34293 Montpellier, France

### Table of Contents

**Figure S1.** A) Structures of the main identified by-products and MS data; B) their corresponding  $^1\text{H}$  &  $^{31}\text{P}\{^1\text{H}\}$  NMR spectra.

Copies of  $^1\text{H}$ ,  $^{13}\text{C}$  and eventually  $^{31}\text{P}$  NMR spectra of all new compounds

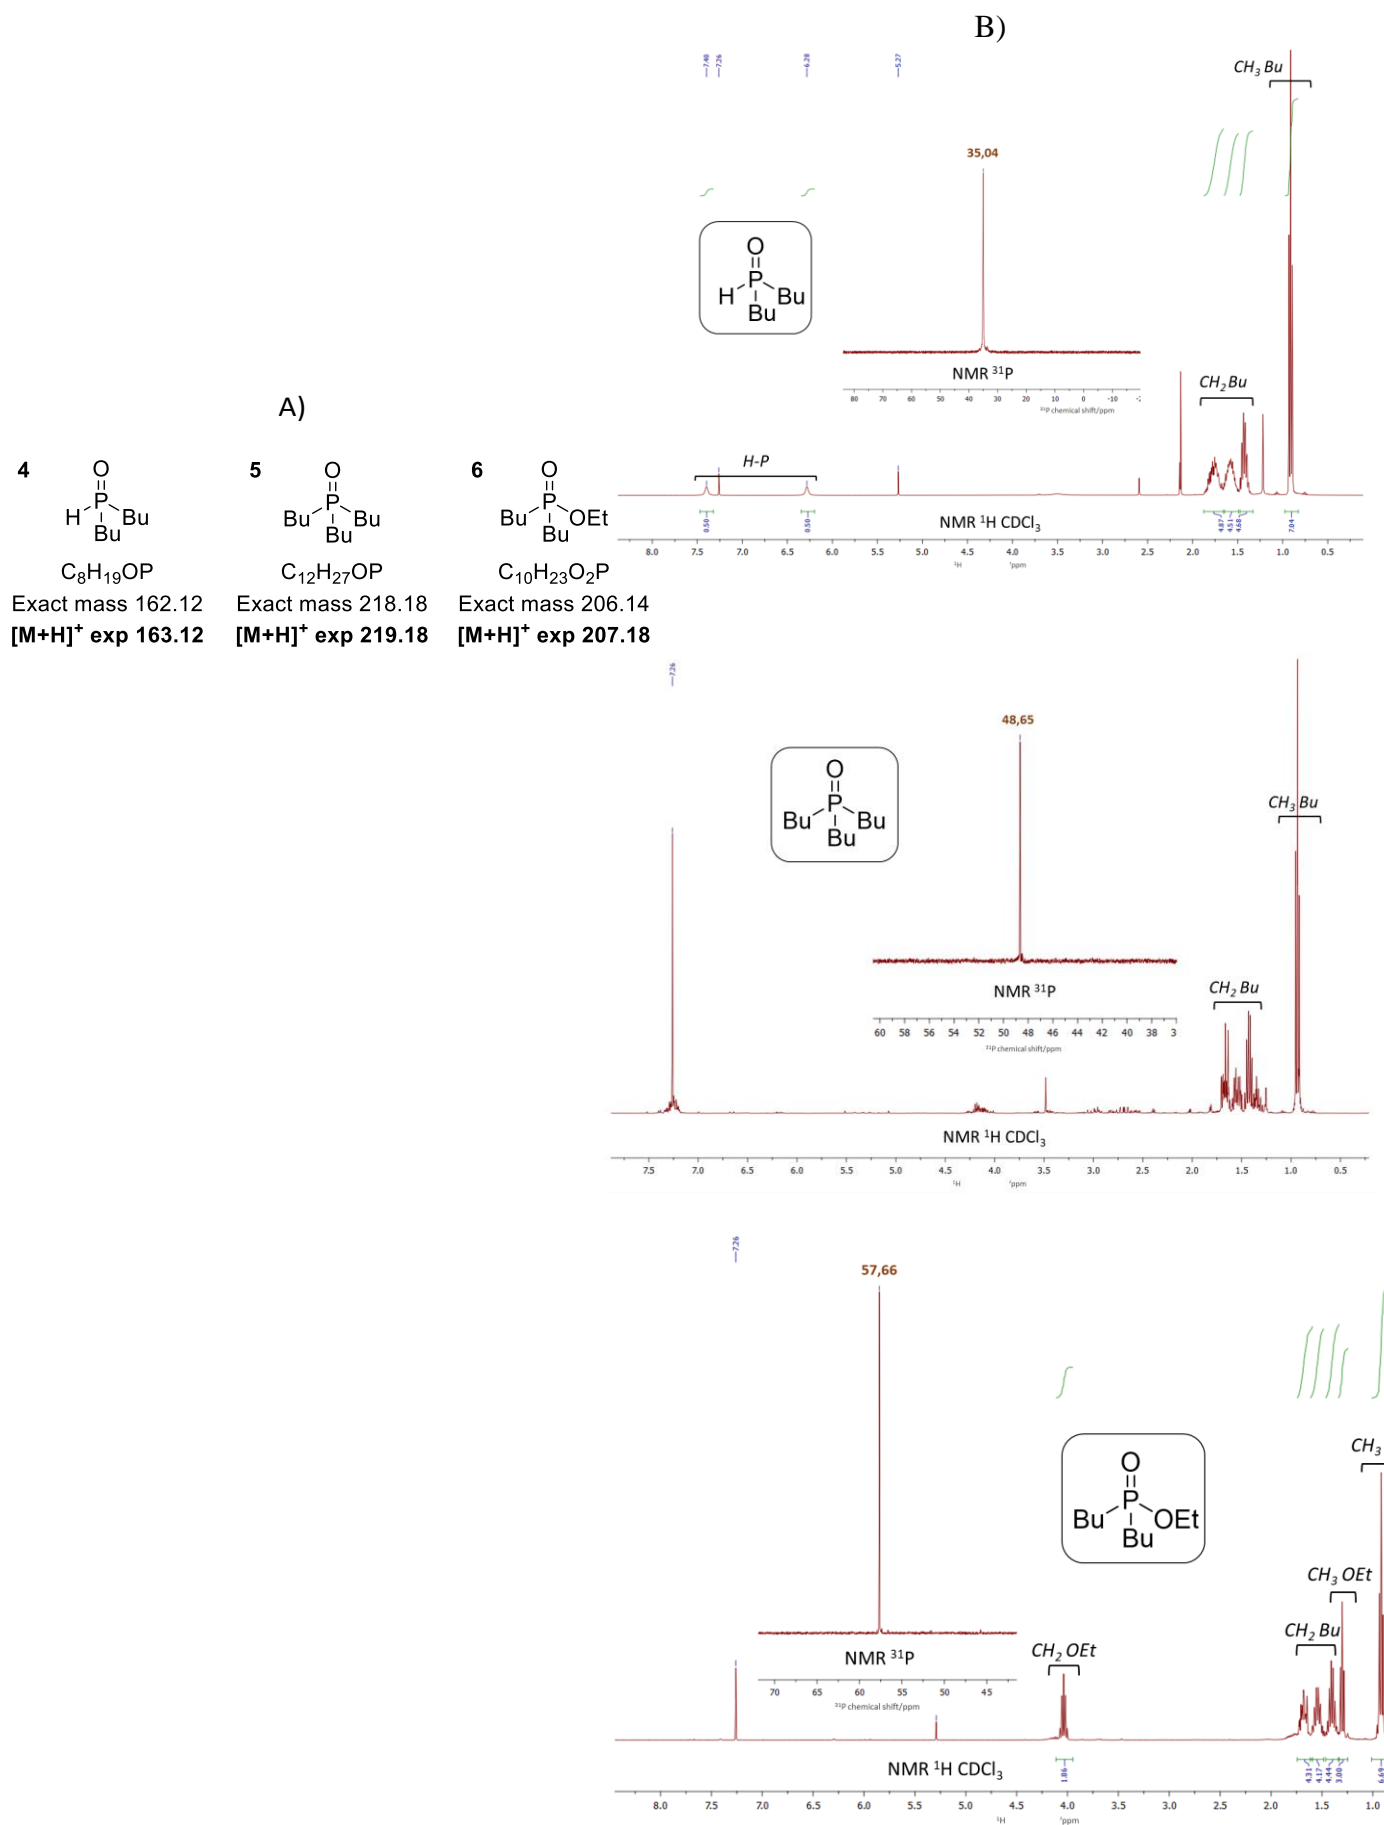

# Copies of $^1\text{H}$ , $^{13}\text{C}$ and eventually $^{31}\text{P}$ NMR spectra of all new compounds

Benzyl (S)-2-(4-(benzyloxy)benzyl)aziridine-1-carbamate - **1e**

RMN  $^1\text{H}$

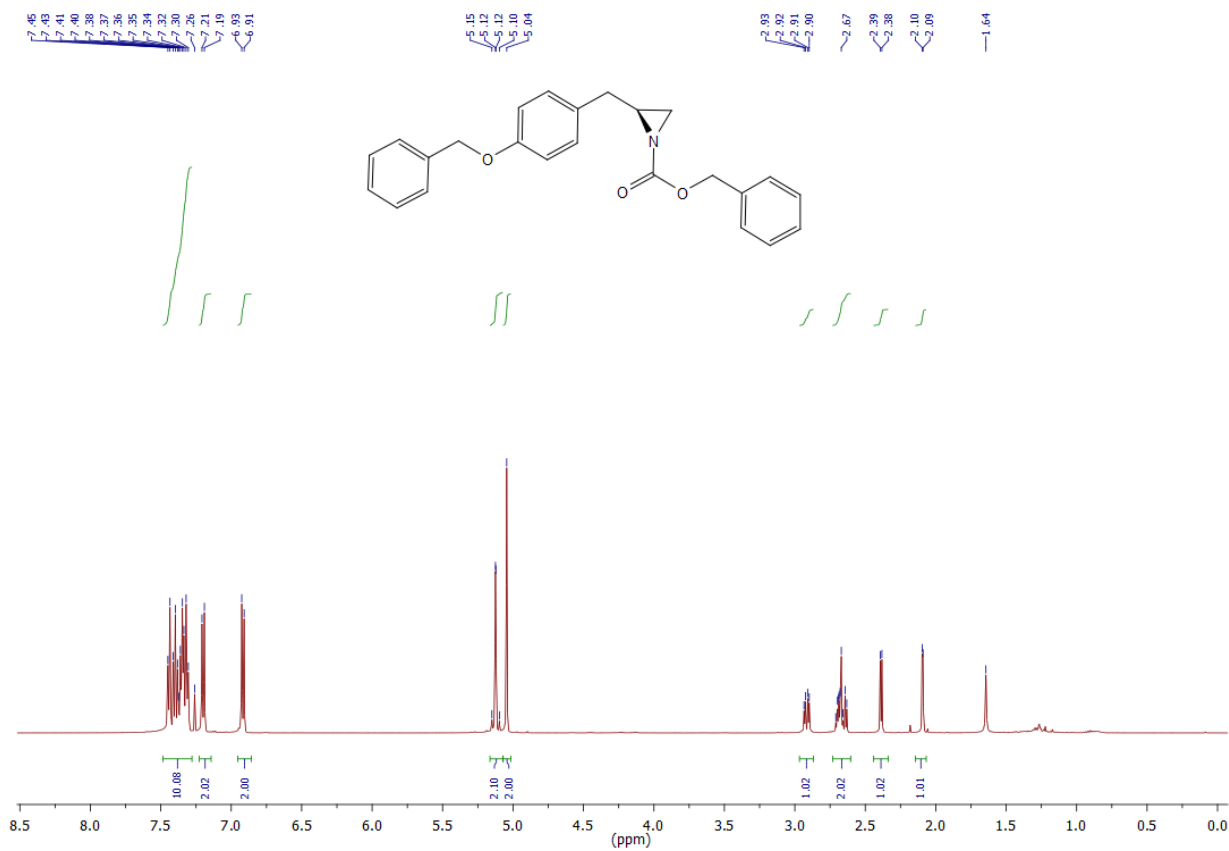

RMN  $^{13}\text{C}\{^1\text{H}\}$

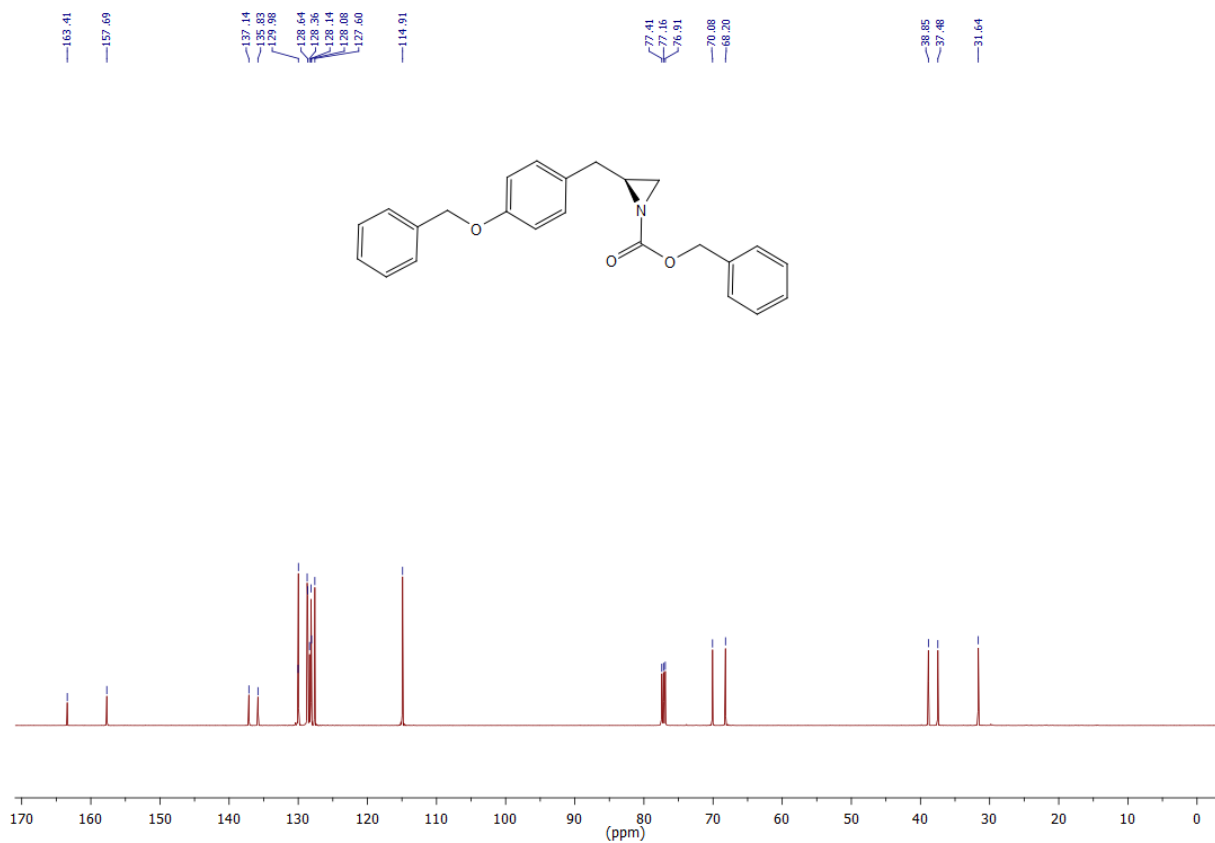

Benzyl (S)-2-((S)-sec-butyl)aziridine-1-carboxylate - **1i**

RMN  $^1\text{H}$

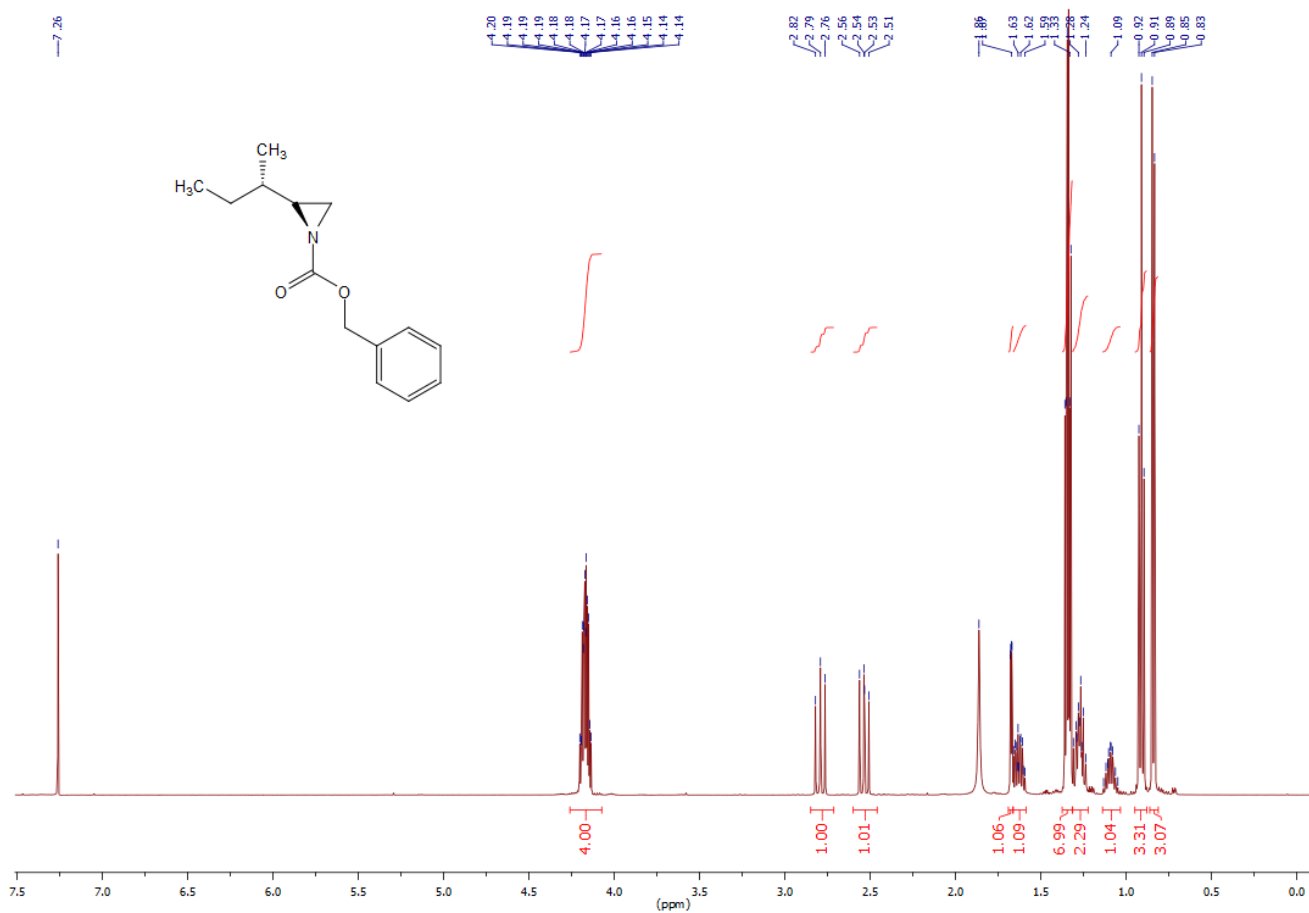

RMN  $^{13}\text{C}\{^1\text{H}\}$

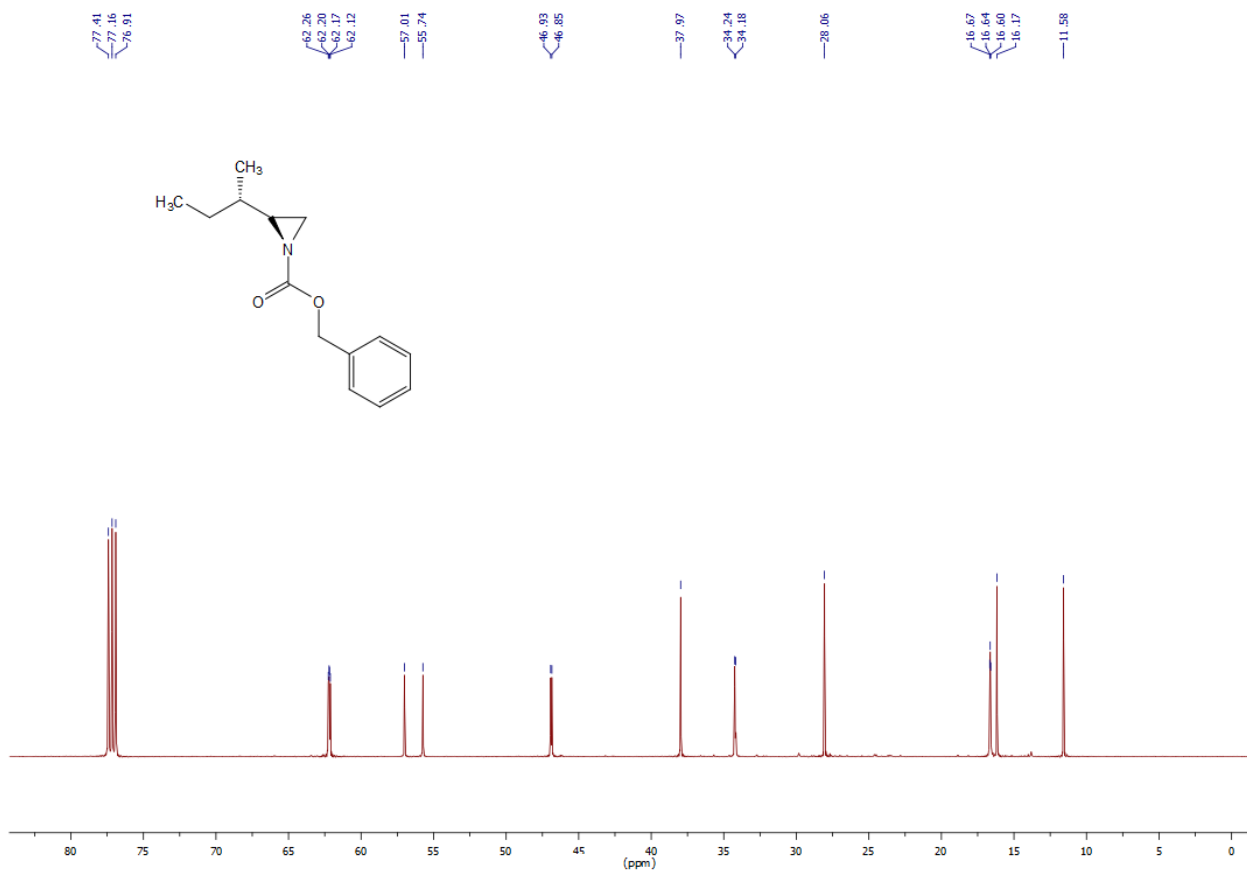

Diethyl (S)-((2-(2-(1H-benzo[d]imidazol-1-yl)ethyl)aziridin-1-yl)methyl)phosphonate – **2a**

RMN  $^1\text{H}$

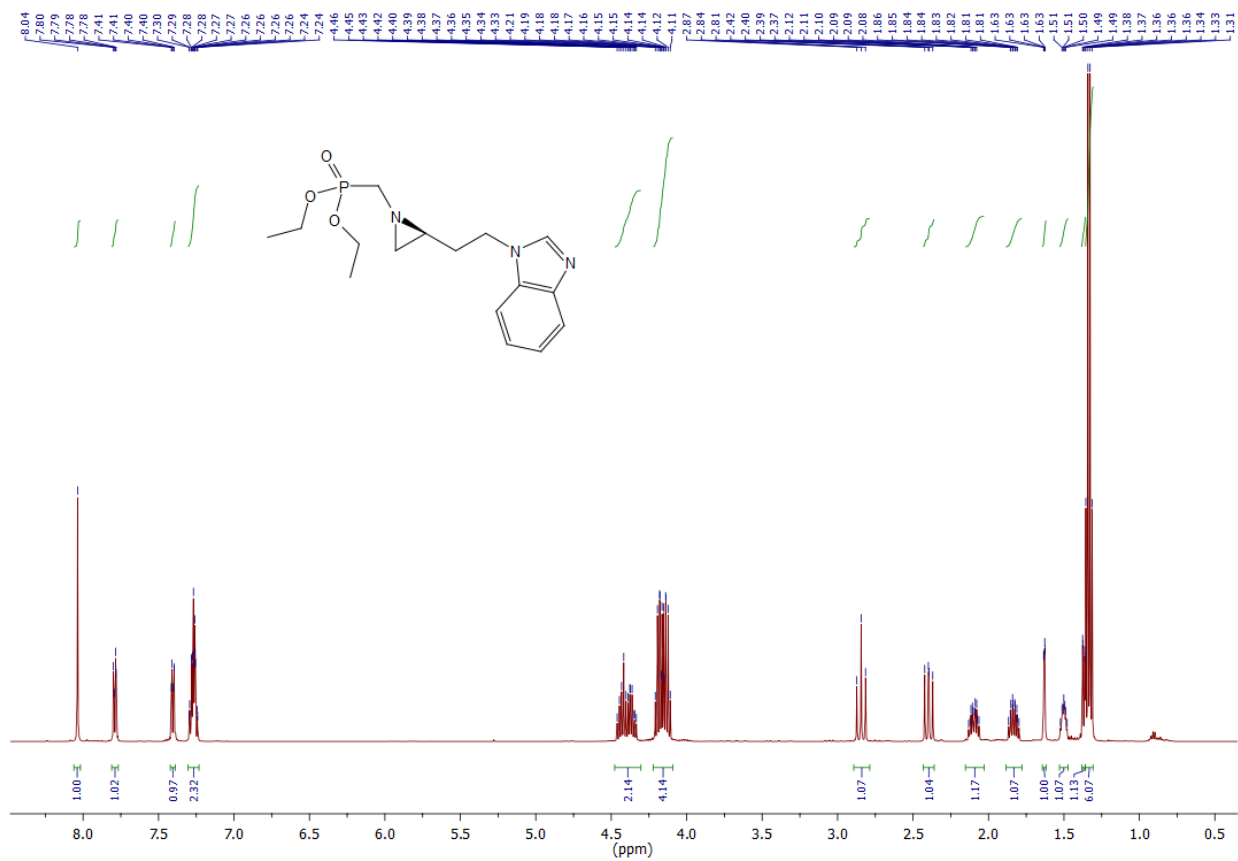

RMN  $^{13}\text{C}\{^1\text{H}\}$

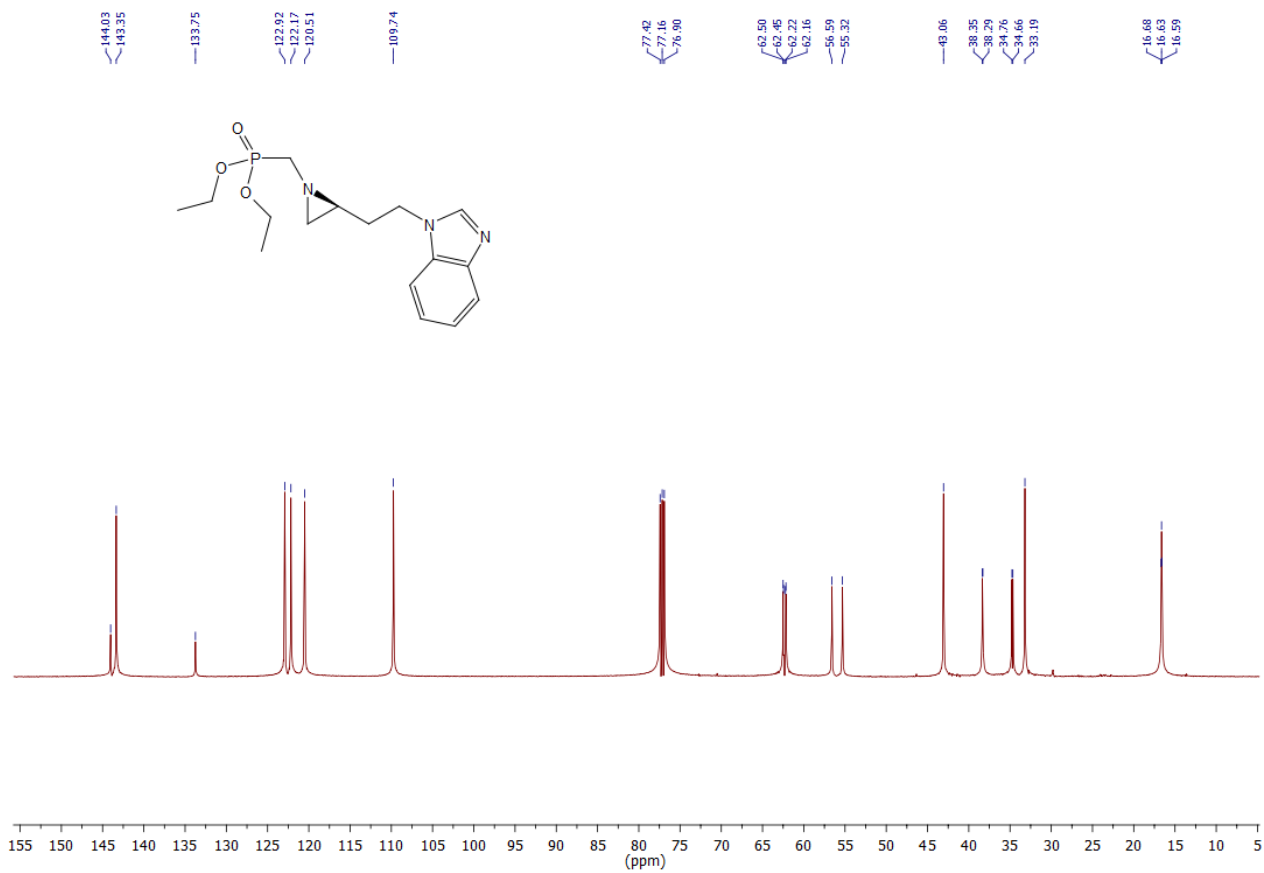

RMN  $^{31}\text{P}\{^1\text{H}\}$

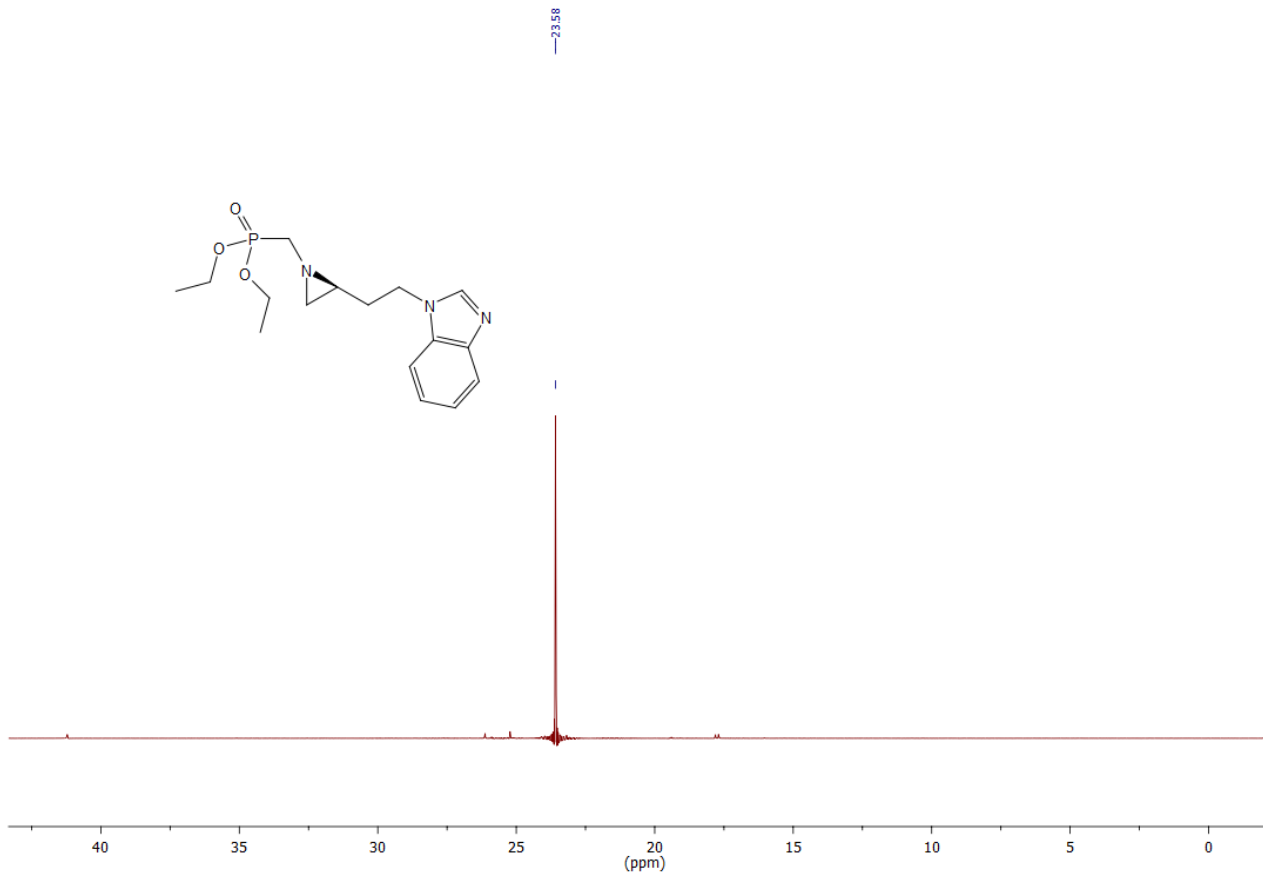

Diethyl (*S*)-((2-benzylaziridin-1-yl)methyl)phosphonate – **2b**

RMN  $^1\text{H}$

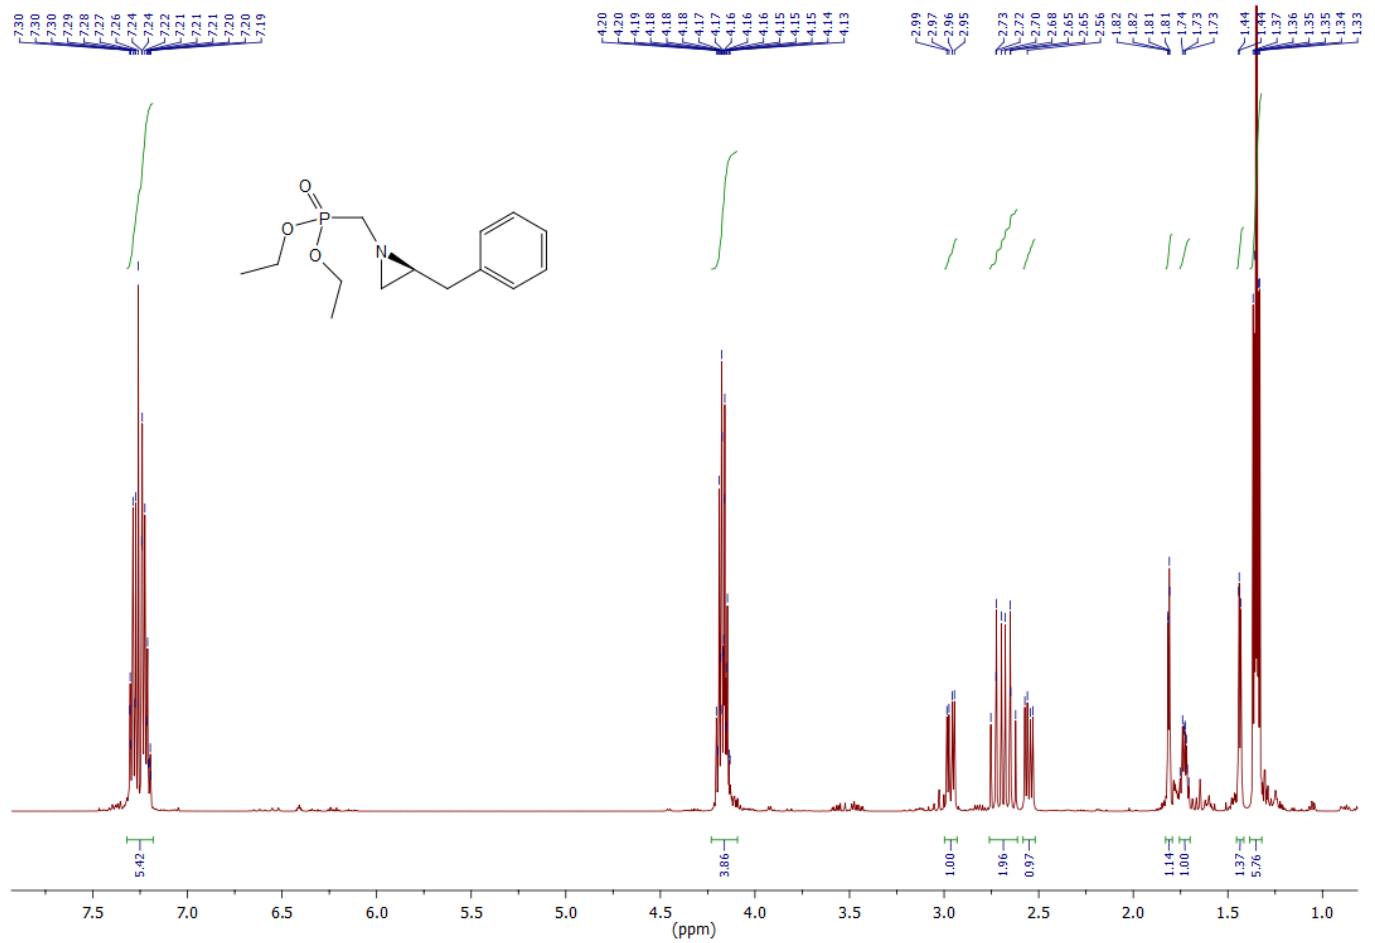

RMN  $^{13}\text{C}\{^1\text{H}\}$

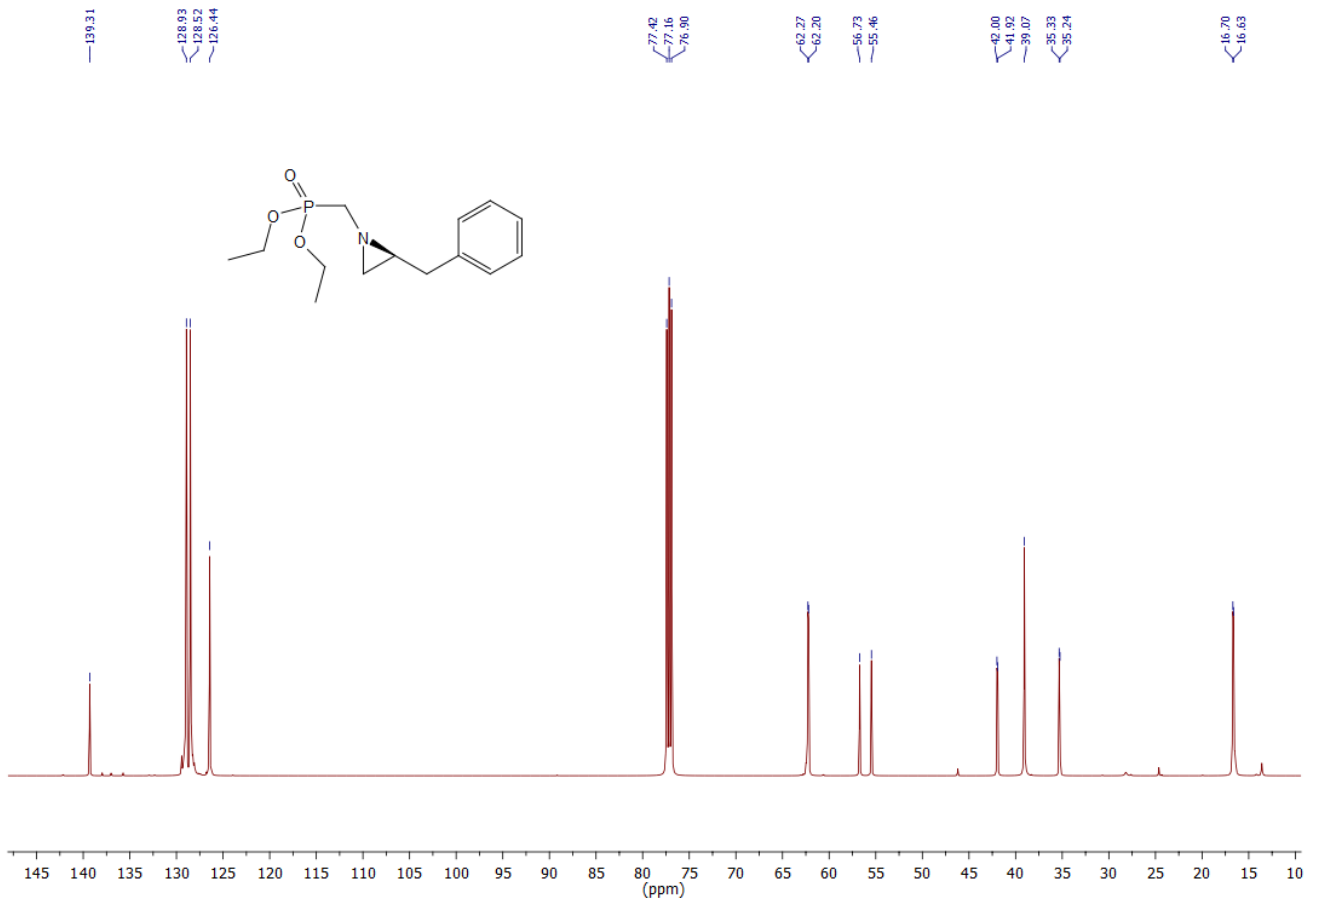

RMN  $^{31}\text{P}\{^1\text{H}\}$

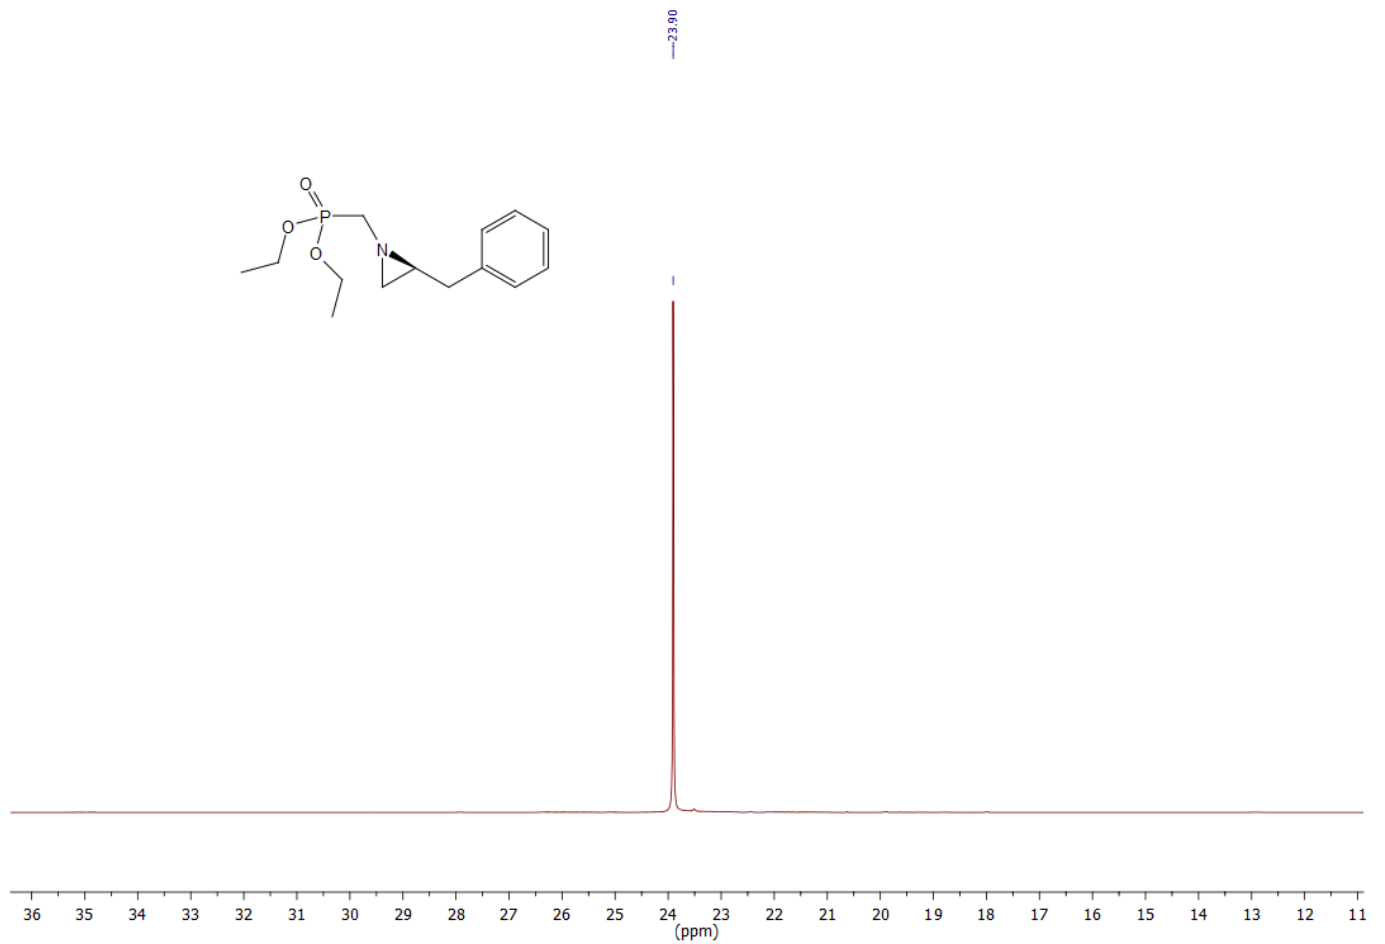

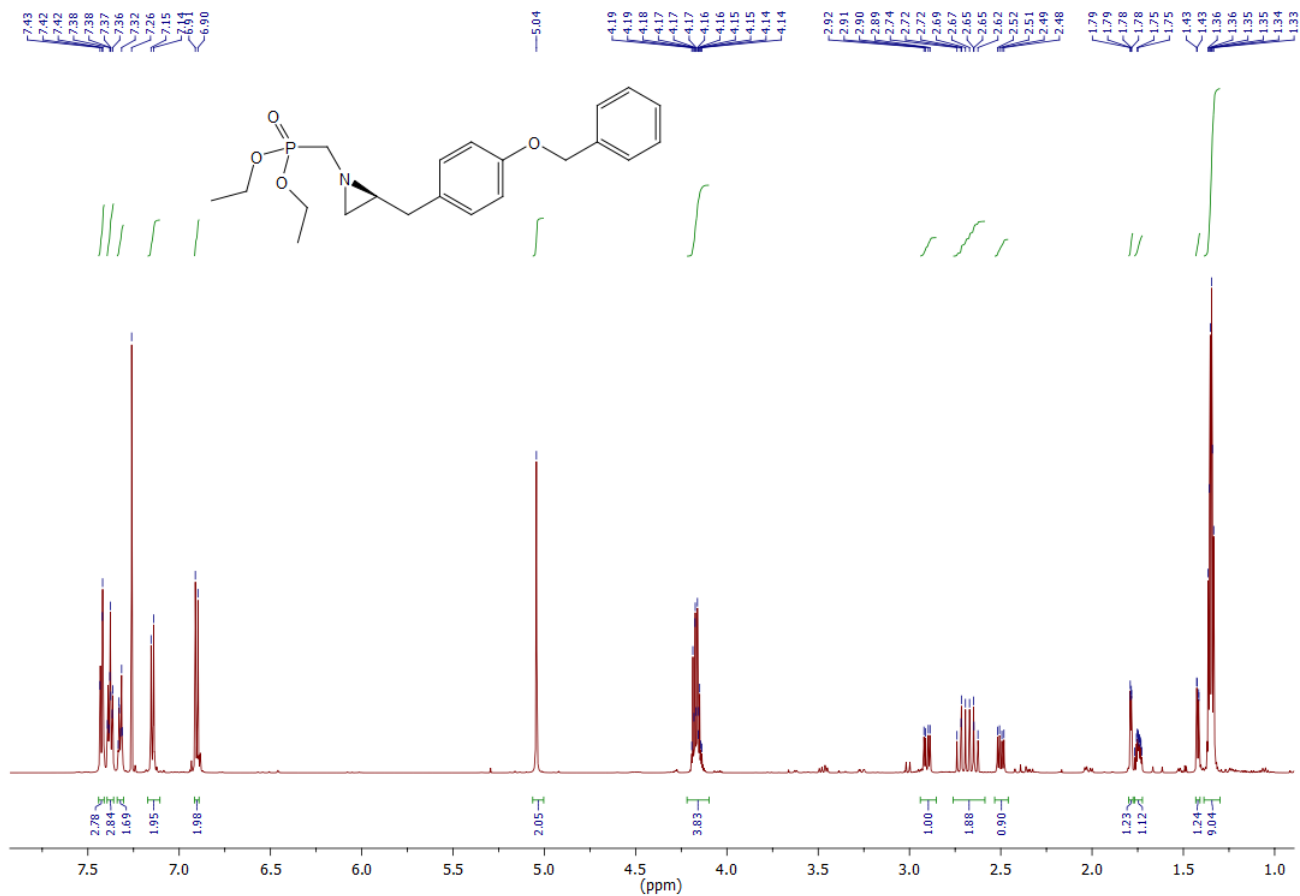

RMN <sup>13</sup>C{<sup>1</sup>H}

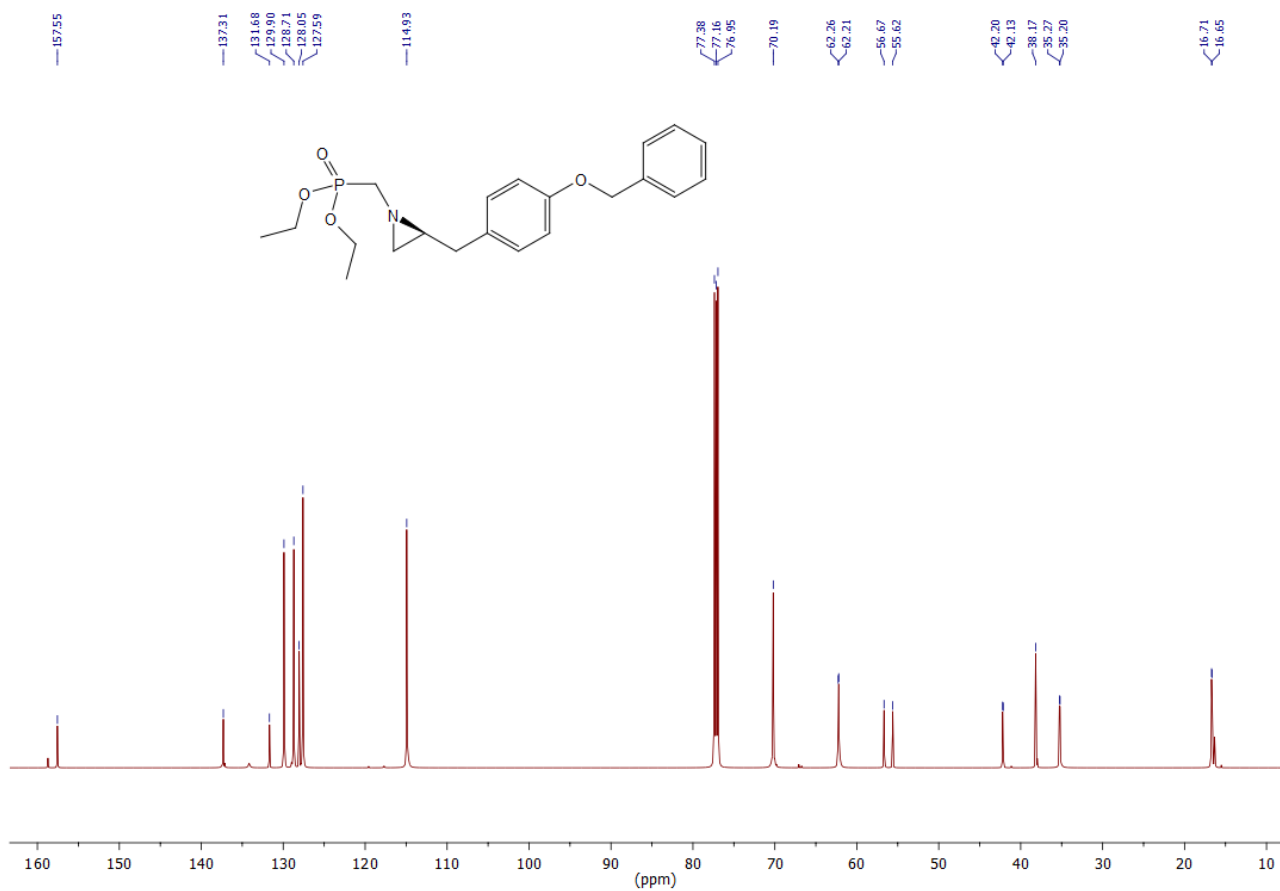



RMN  $^{31}\text{P}\{^1\text{H}\}$

-24.19

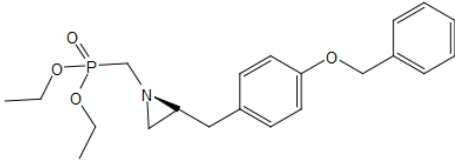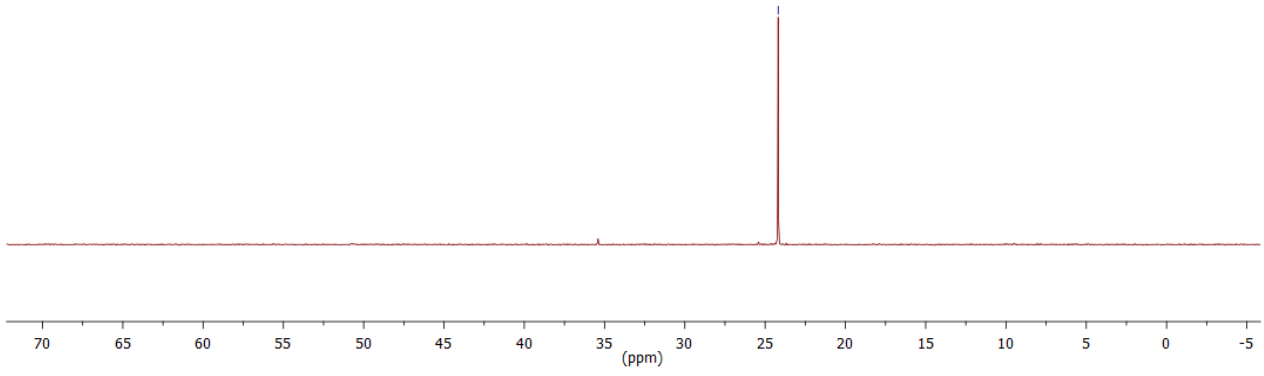

Diethyl (S)-((2-((1*H*-indol-3-yl)methyl)aziridin-1-yl)methyl)phosphonate – **2f**

RMN <sup>1</sup>H

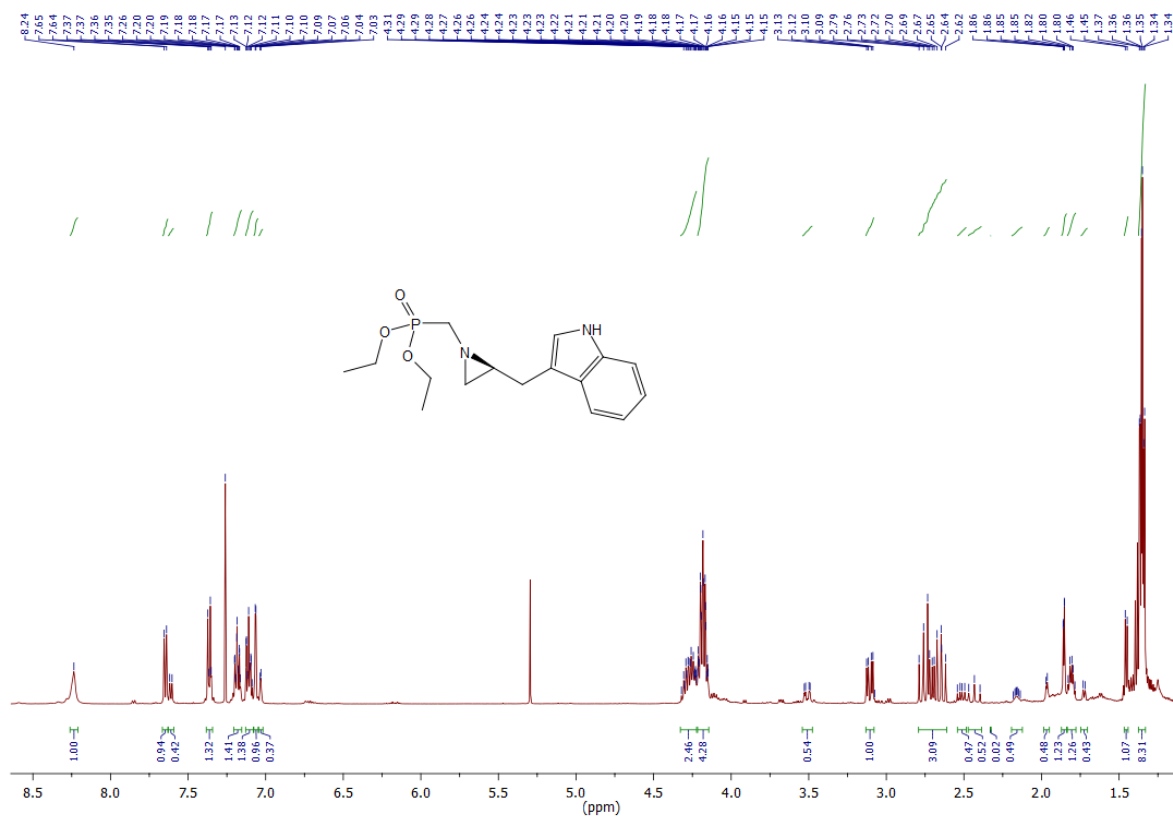

RMN <sup>13</sup>C{<sup>1</sup>H}

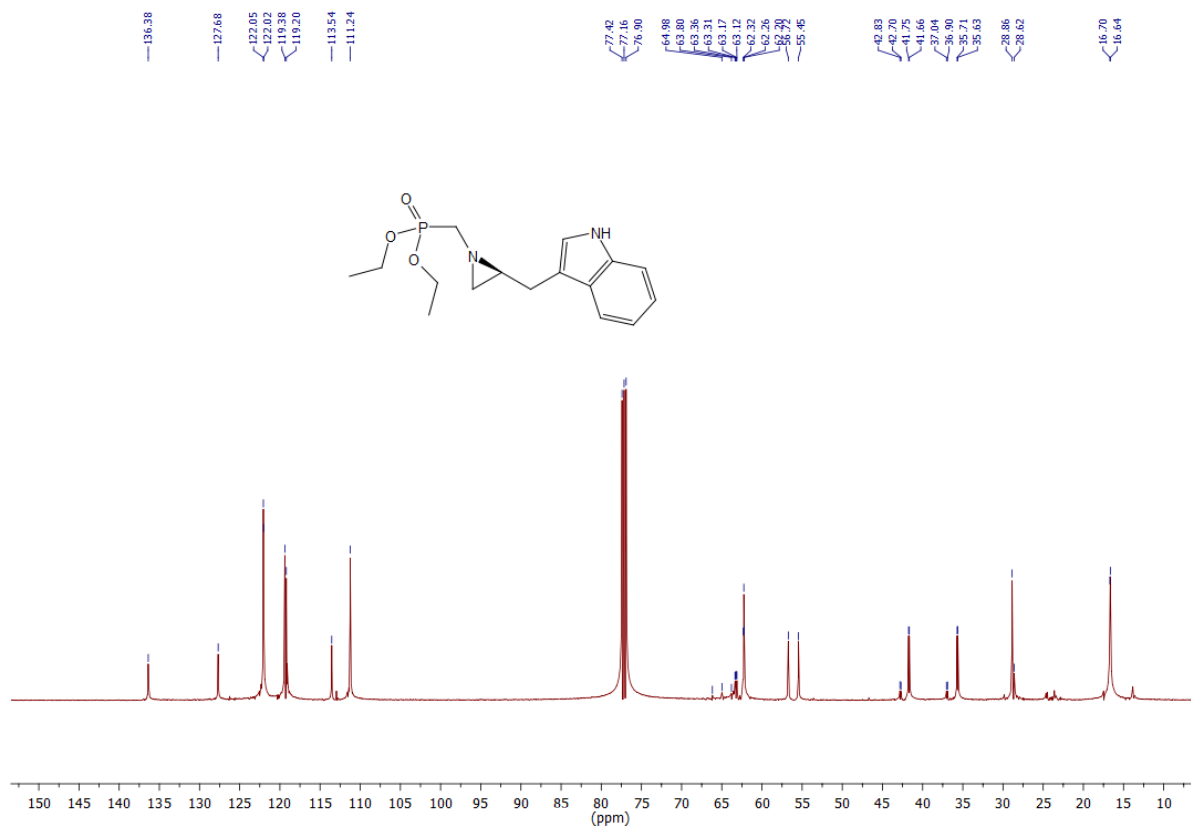

RMN  $^{31}\text{P}\{^1\text{H}\}$

—24.16

—18.14

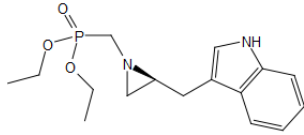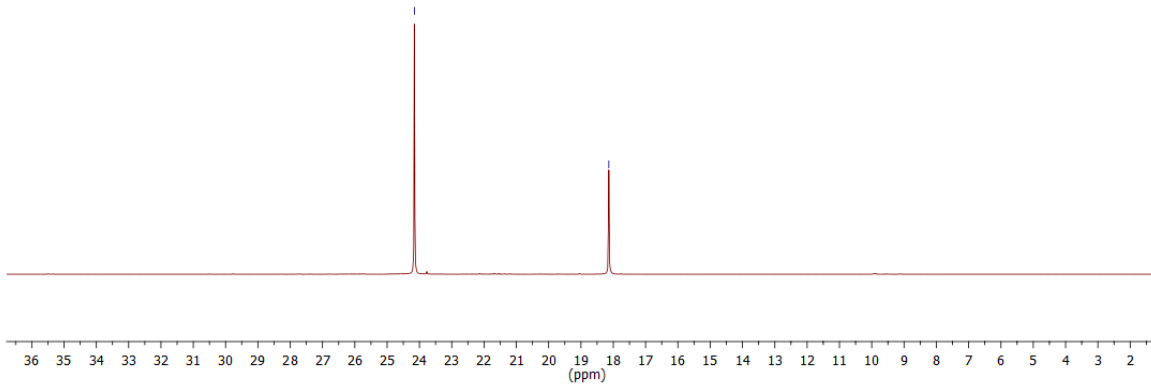

Diethyl (((S)-2-((S)-*sec*-butyl)aziridin-1-yl)methyl)phosphonate – **2h**

RMN  $^1\text{H}$

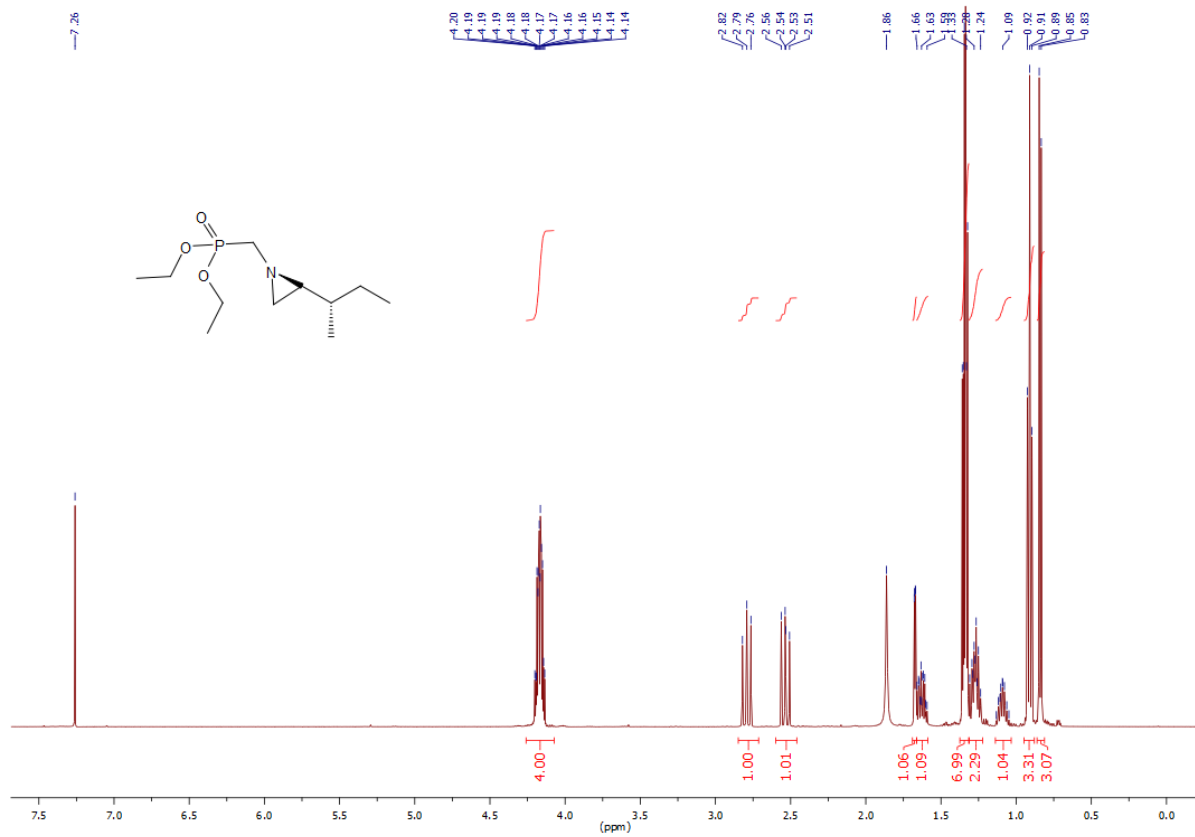

RMN  $^{13}\text{C}\{^1\text{H}\}$

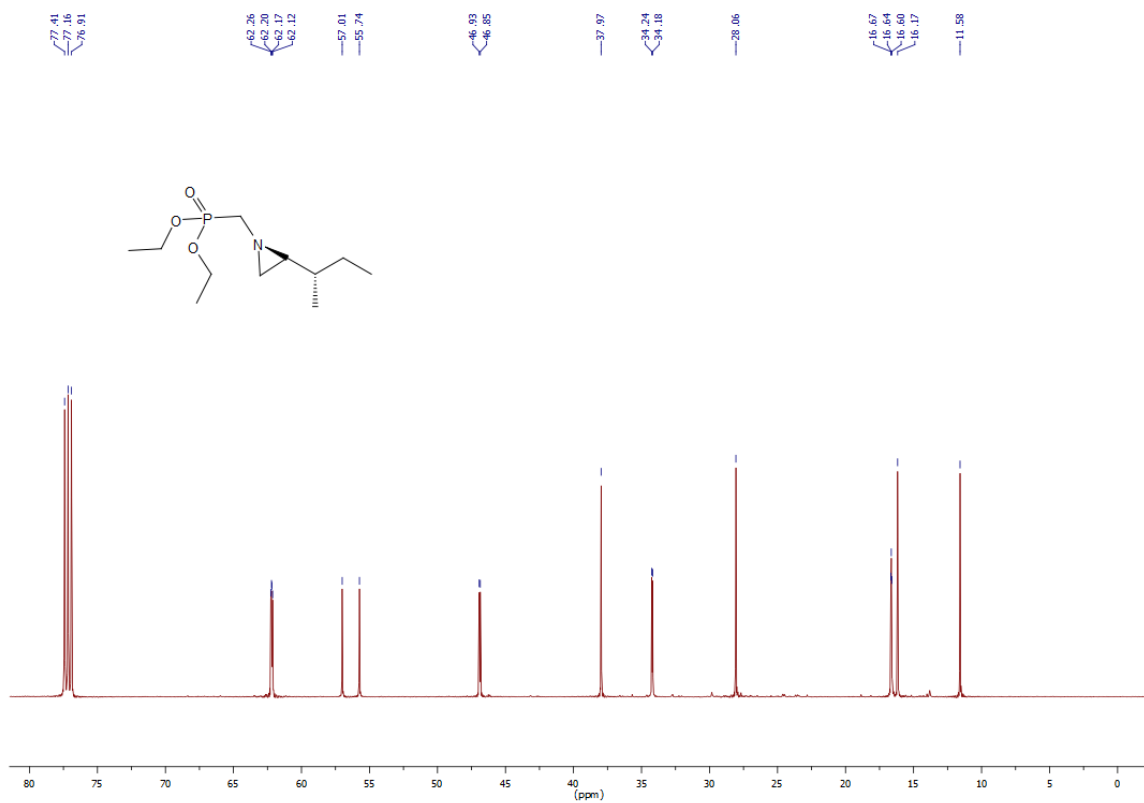

RMN  $^{31}\text{P}\{^1\text{H}\}$

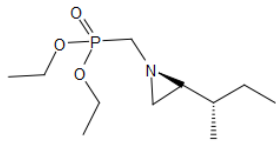

—24.37

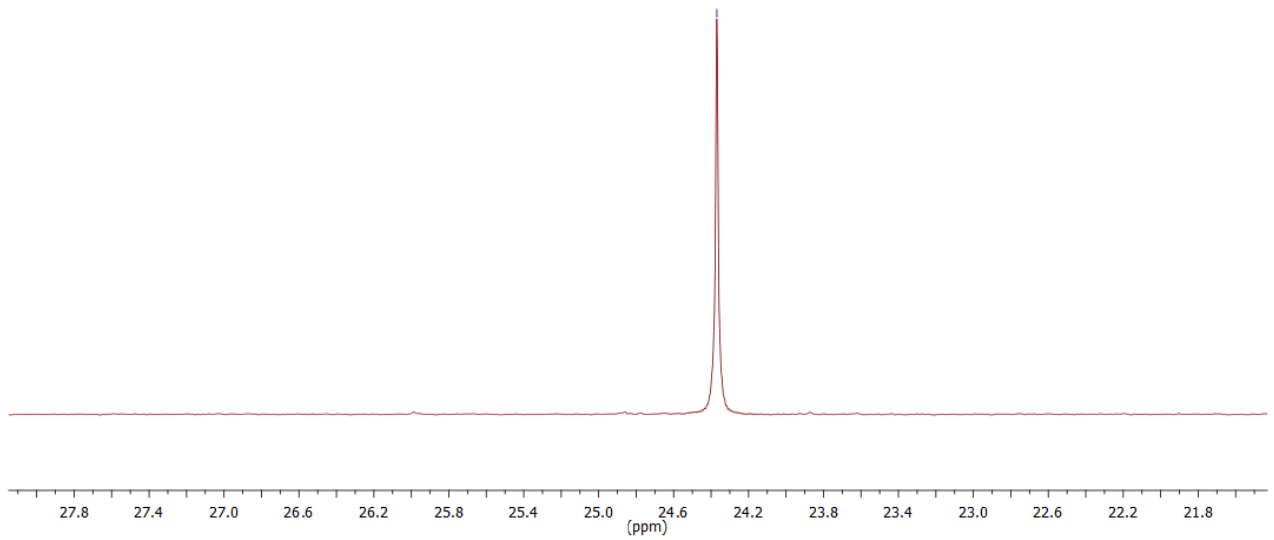

*tert*-Butyl (*S*)-(4-(1-((diethoxyphosphoryl)methyl)aziridin-2-yl)butyl)carbamate **2j**

RMN <sup>1</sup>H

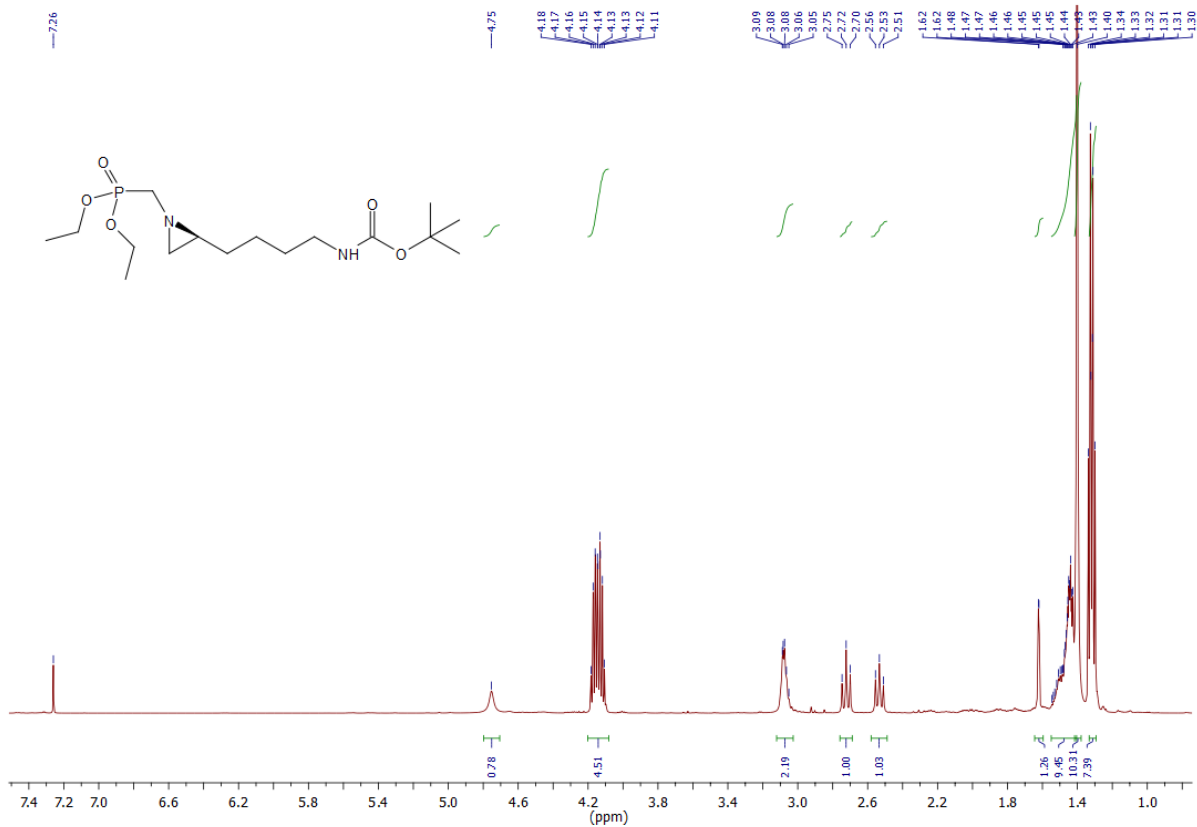

RMN <sup>13</sup>C{<sup>1</sup>H}

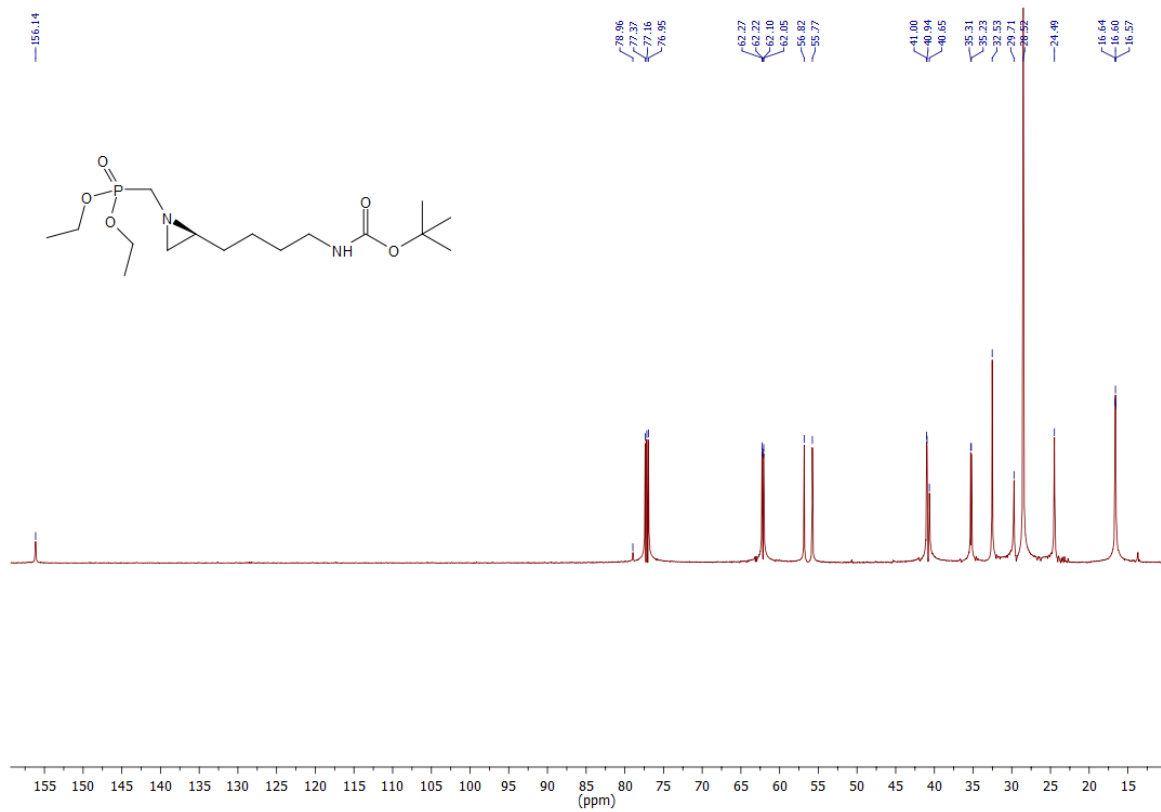

RMN  $^{31}\text{P}\{^1\text{H}\}$

-23.95

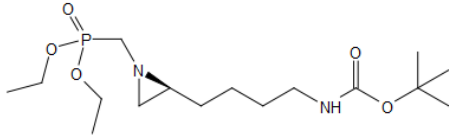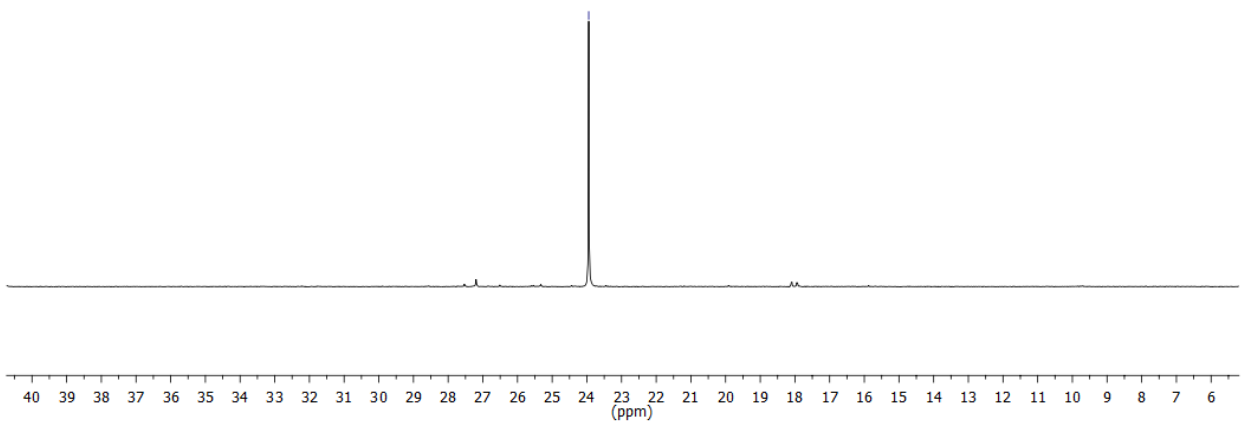

Diethyl (((1R,6S)-7-azabicyclo[4.1.0]heptan-7-yl)methylene)phosphonate (**21**)

RMN  $^1\text{H}$

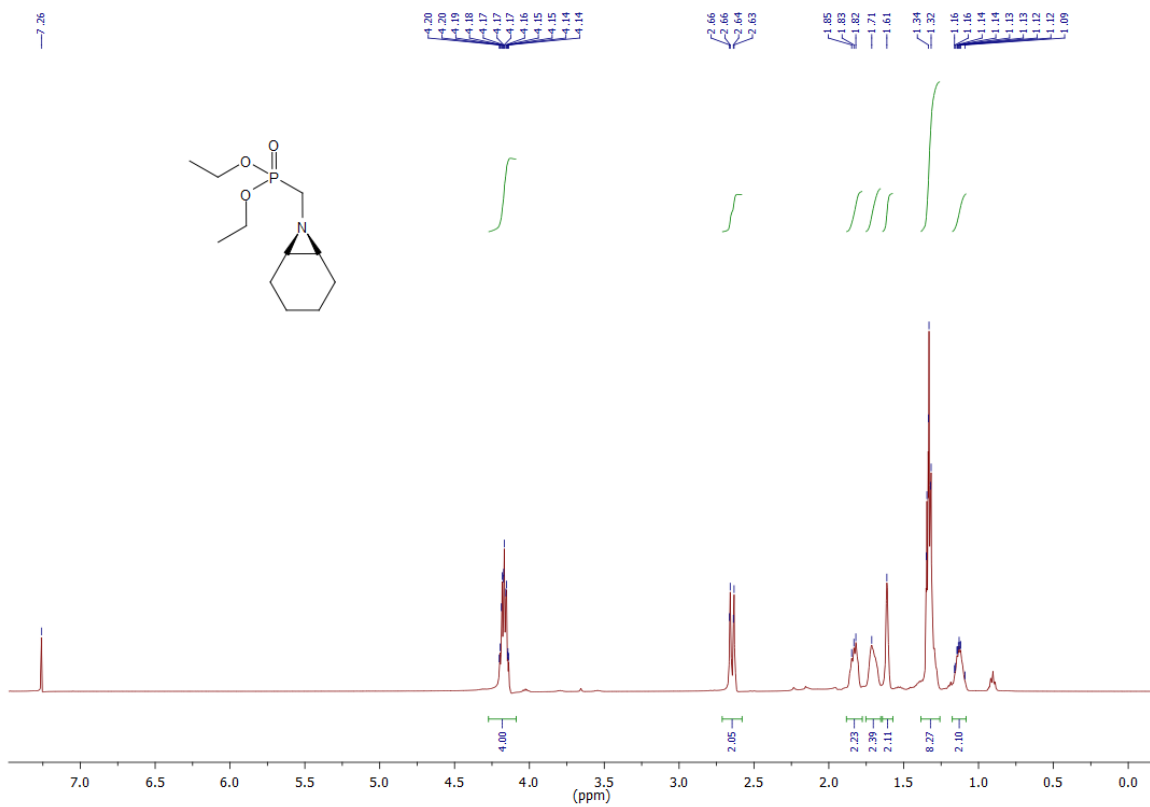

RMN  $^{13}\text{C}\{^1\text{H}\}$

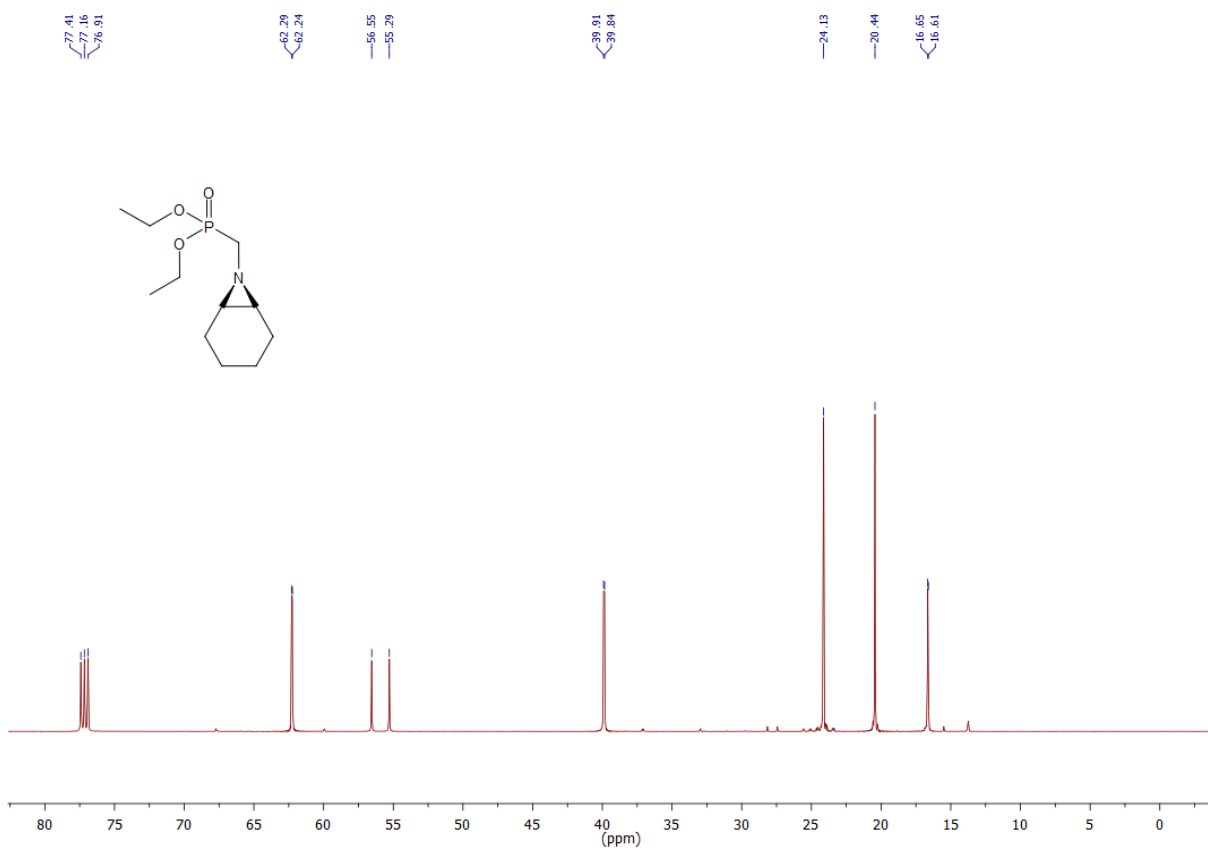



RMN  $^{31}\text{P}\{^1\text{H}\}$

24.46  
24.40  
24.38  
24.36  
24.32  
24.29  
24.22  
24.18

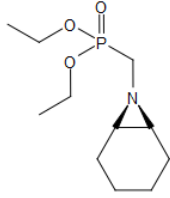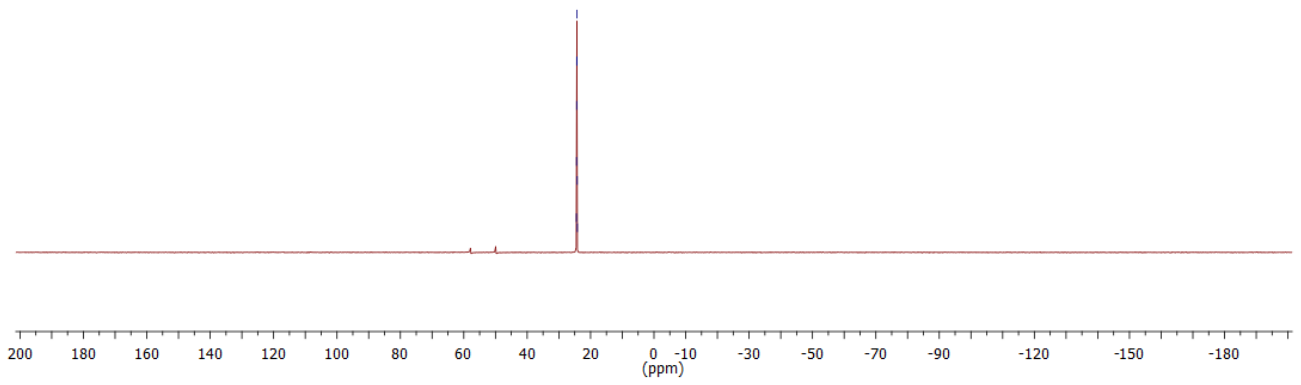

Supplement: d2nj00595f1.pdf [file d2nj00595f1.pdf]
